# Supplementary material for: Precision phenotyping of a barley diversity set reveals distinct drought response strategies
Source: PubMed Central journal article supplement (PMC11231632; doi:10.3389/fpls.2024.1393991), 2024-06-24
Supplement: Table_1.pdf [file Table_1.pdf]

Table S1. 81 spring barley lines for first screening

| Accession | Code | Name         | Rows | Release | Country        | Pedigree                                                   | Breeder                                               | DETAILS           |
|-----------|------|--------------|------|---------|----------------|------------------------------------------------------------|-------------------------------------------------------|-------------------|
| 126       | 2009 | Aapo         | 2    | 1975    | Finland        | Carlsberg x Riegel                                         | Hankkija Plant Breeding Institute                     | Year 1915-2006    |
| 128       | 2010 | Abava        | 2    | 1978    | Latvia         | Mari/Elsa//Domen                                           | Stende Plant Breeding Station                         | 2- row 72         |
| 129       | 2011 | Agneta       | 6    | 1981    | Sweden         | Asa x Frisia x Eddall x Monte Christo                      | Svalöf                                                | 6- row 9          |
| 131       | 2012 | Akcent       | 2    | 1992    | Czech Republic | Salome/EP 79                                               | Selgen Stupice                                        | Breeders 38       |
| 132       | 2013 | Akka         | 2    | 1970    | Sweden         | (Arla)6 x Monte Cristo                                     | Weibull                                               | Austria 1         |
| 135       | 2015 | Alis         | 2    | 1985    | Denmark        | Triumpf x Rosie Abed                                       | Abed                                                  | Czech Republic 9  |
| 136       | 2016 | Alliot       | 2    | 1999    | Denmark        | Chariot x Alexis                                           | Pajbjergfonden                                        | Denmark 14        |
| 137       | 2018 | Anni         | 2    | 1980    | Estonia        | Lola x Liisa                                               | Jogeva Plant Breeding Institute                       | Estonia 2         |
| 142       | 2019 | Ansis        | 2    | 1996    | Latvia         | Jarek/Taifun                                               | Stende Plant Breeding Station                         | Finland 7         |
| 143       | 2020 | Apex         | 2    | 1984    | Netherlands    | Aramir x F1[CEB 6721 x (Julia3 x Volla x L100)]            | Cebeco                                                | France 3          |
| 144       | 2021 | Aramir       | 2    | 1974    | Netherlands    | Volla x Emir                                               | Cebeco                                                | Germany 9         |
| 148       | 2024 | Artturi      | 6    | 1992    | Finland        | Arra x Nord                                                | Boreal Plant Breeding Ltd                             | Italy 1           |
| 149       | 2025 | Arvo         | 2    | 1966    | Finland        | Balder x Helmi                                             | Agricultural Experiment Station of Finland, Jokioinen | Latvia 5          |
| 153       | 2027 | Athos        | 2    | 1975    | France         | 207*Emir                                                   | Desprez                                               | Netherlands 5     |
| 154       | 2028 | Atlas        | 2    | 1976    | Czech Republic | M- SS 55/Diamant                                           | Selgen Stupice                                        | Norway 1          |
| 155       | 2029 | Atribut      | 2    | 1996    | Czech Republic | KM V 3-83/BR 2174                                          | Selgen Stupice                                        | Slovak Republic 1 |
| 158       | 2030 | Balder J     | 2    | 1964    | Sweden         | Balder X-Ray Mutant                                        | Weibull                                               | Sweden 12         |
| 159       | 2031 | Balga        | 2    | 1990    | Latvia         | Gunilla/KM 1192                                            | APP Valsts Priekulu laukaugu selekcijas instituts     | United Kingdom 11 |
| 160       | 2032 | Barabas      | 2    | 2005    | Denmark        | SJ 970621 x (Lux x Annabell)                               | Sejet                                                 | 14 countries 81   |
| 162       | 2033 | Barke        | 2    | 1996    | Germany        | Libelle x Alexis                                           | Breun                                                 |                   |
| 163       | 2034 | Baronesse    | 2    | 1989    | Germany        | ((343/6 x V34/6) x J -427) x (Oriol x LBW6153 P40)         | Nordsaat                                              |                   |
| 164       | 2035 | Beatrix      | 2    | 2004    | Germany        | Viskosa x Pasadena                                         | Nordsaat                                              |                   |
| 165       | 2036 | Berenice     | 2    | 1972    | France         | Union*(Bordia*Kenia)*Frisia                                | INRA                                                  |                   |
| 166       | 2037 | Binder       | 2    | 1916    | Denmark        | HOR3684/76 ABED selection in Hanna                         | Abed                                                  |                   |
| 168       | 2039 | Birka        | 2    | 1981    | Sweden         | Baladi16 x (Rika x ((Tellus x (Monte_Christo x Tellus MD)) | Weibull                                               |                   |
| 169       | 2040 | Blenheim     | 2    | 1992    | United Kingdom | Triumph*Egmont                                             | PBI                                                   |                   |
| 173       | 2043 | Braemar      | 2    | 2000    | United Kingdom | NFC 5563 x NFC 94.20                                       | New Farm Crops (NFC)                                  |                   |
| 174       | 2044 | Brazil       | 2    | 2001    | France         | Trebon x Cooper                                            | Momont                                                |                   |
| 176       | 2045 | Britta A     | 2    | 1964    | Sweden         | (Binder*Opal)*(Balder*Kenia)                               | Lantmännen SW Seed                                    |                   |
| 180       | 2046 | Caja         | 2    | 1980    | Denmark        | PF-M-13 x PF 62-6/6-4                                      | Pajbjerg                                              |                   |
| 187       | 2048 | Carlsberg II | 2    | 1947    | Denmark        | Prentice x Maja                                            | Carlsberg                                             |                   |
| 190       | 2050 | Ceylon       | 2    | 2003    | Netherlands    | Portia x Amber                                             | Cebeco                                                |                   |
| 193       | 2051 | Chanell      | 2    | 2006    | Denmark        | Barke x Ca 500201                                          | Carlsberg                                             |                   |
| 194       | 2052 | Chariot      | 2    | 1992    | United Kingdom | Dera*(Carnival*Atem)                                       | PBI                                                   |                   |
| 200       | 2053 | Claret       | 2    | 1980    | United Kingdom | ((Proctor*HP 5466)*Armelle)*Abacus                         | Nickerson                                             |                   |
| 201       | 2054 | Class        | 2    | 2003    | United Kingdom | Prestige x Optic                                           | PBI                                                   |                   |
| 205       | 2056 | Cooper       | 2    | 1994    | United Kingdom | (Corniche*Force)*Troop                                     | New Farm Crops (NFC)                                  |                   |
| 206       | 2057 | Corgi        | 2    | 1983    | United Kingdom | Triumph*15533 Co                                           | Welsh PI Breed Stn                                    |                   |
| 210       | 2059 | Dandy        | 2    | 1988    | United Kingdom | Egmont*Atem                                                | Welsh PI Breed Stn                                    |                   |
| 209       | 2060 | Croydon      | 2    | 1982    | Sweden         | welam x tellus M <sub>1</sub> D                            | Weibull                                               |                   |
| 208       | 2061 | Cristalia    | 2    | 2004    | United Kingdom | Ortoli x Brise                                             | Syngenta                                              |                   |
| 211       | 2062 | Danuta       | 2    | 2000    | Germany        | 90014DH [Krona] x (Salome x Maresi)                        | Nordsaat                                              |                   |
| 212       | 2063 | Deba Abed    | 2    | 1965    | Denmark        | Abed Denso*Weihestephaner MR 2                             | Abed                                                  |                   |
| 213       | 2064 | Delta        | 2    | 1959    | Netherlands    | Tyra*Claret OR Kenia*H.laevigatum*Gull                     | Cebeco                                                |                   |
| 214       | 2065 | Derkado      | 2    | 1992    | Germany        | Lada*Salome                                                | Hadmersleben                                          |                   |
| 215       | 2066 | Dialog       | 2    | 2000    | Denmark        | Otira x (Ferment x Mentor)                                 | Sejet                                                 |                   |
| 216       | 2067 | Diamant      | 2    | 1965    | Czech Republic | Valticky X-ray Mutant                                      | OGZ                                                   |                   |
| 217       | 2068 | Digersano    | 2    | 1991    | Italy          | Mari-Coho x Sul-Mackta                                     | Cermis/ENEA                                           |                   |
| 223       | 2070 | Drost        | 2    | 1954    | Denmark        | Maja x Kenia                                               | Pajbjerg                                              |                   |

|     |      |              |   |      |                 |                                                                  |                                   |
|-----|------|--------------|---|------|-----------------|------------------------------------------------------------------|-----------------------------------|
| 224 | 2071 | Druvis       | 6 | 1999 | Latvia          | Dobrij/HVS 115440                                                | Stende Plant Breeding Station     |
| 226 | 2072 | Edda         | 6 | 1949 | Sweden          | Vega x Asplund                                                   | Svalöf                            |
| 227 | 2073 | Eero         | 6 | 1975 | Finland         | Mari 2r x Otra                                                   | Hankkija Plant Breeding Institute |
| 228 | 2074 | Egmont       | 2 | 1980 | United Kingdom  | (Maris Yak*W 1001)*Vada                                          | PBI                               |
| 229 | 2075 | Elantra      | 2 | 1998 | Denmark         | Caminant x Heron                                                 | Sejet                             |
| 230 | 2076 | Elo          | 2 | 1989 | Estonia         | Triumph x Lofa                                                   | Jogeva Plant Breeding Institute   |
| 231 | 2077 | Emir         | 2 | 1962 | Netherlands     | Delta*(Agio*(Kenia)2*Arabian Variety)                            | Cebeco                            |
| 234 | 2079 | Etu          | 6 | 1970 | Finland         | Bonus M x Varde                                                  | Boreal Plant Breeding Ltd         |
| 235 | 2080 | Eunova       | 2 | 2000 | Austria         | (Serva x ML502) x CF 79                                          | Probstdorf                        |
| 237 | 2081 | Famin        | 2 | 1996 | Czech Republic  | Akcent/CE 597                                                    | Hrubcice                          |
| 238 | 2082 | Favorit      | 2 | 1973 | Czech Republic  | Diamant/F.Union                                                  | Hrubcice                          |
| 239 | 2083 | Felicitas    | 2 | 2002 | Germany         | (Baronesse x Meltan) x Krona                                     | Breun                             |
| 240 | 2084 | Formula      | 2 | 1987 | Sweden          | Triumph x A 11 3109                                              | Weibull                           |
| 241 | 2085 | Forum        | 2 | 1993 | Czech Republic  | H 387-75/Horpatsi Ketscoros//044-78                              | HYBRITECH                         |
| 242 | 2086 | Freja        | 2 | 1941 | Sweden          | Victory X Opal                                                   | Svalöf                            |
| 243 | 2087 | Frisia       | 6 | 1955 | Germany         | (Granat*Pirthgjarn)*(Eckendorfer WG*Kalckreuthen WG)             | Breustedt                         |
| 245 | 2088 | Galan        | 2 | 1990 | Slovak Republic | Complex hybrid. K 2567/HE 1428                                   | Sladkovicovo                      |
| 267 | 2089 | Helmi        | 2 | 1942 | Finland         | Binder X Pikio                                                   | na                                |
| 268 | 2090 | Heris        | 2 | 1998 | Czech Republic  | HE 4431/CE 431                                                   | Hrubcice                          |
| 51  | 2091 | Harry        | 2 | 1978 | Sweden          | Maythorpe Gamma-Ray Mutant                                       | Weibull                           |
| 260 | 2092 | Hanna        | 2 | 1992 | Sweden          | (Armelle*Lud)*Luke                                               | Weibull                           |
| 259 | 2093 | Hankkija_673 | 6 | 1973 | Finland         | (Herta 8 x Byg 191 x Ingrid x Minerva) x Kristina                | Hankkija Plant Breeding Institute |
| 258 | 2094 | Hanka        | 2 | 1997 | Germany         | Swedish (Gotland) Land Variety                                   | Semundo                           |
| 257 | 2095 | Hana         | 2 | 1973 | Czech Republic  | Diamant/Alsa                                                     | OGZ                               |
| 255 | 2096 | Gull         | 2 | 1915 | Sweden          | Swedish Land Variety                                             | Svalöf                            |
| 254 | 2097 | Gorm         | 2 | 1981 | Denmark         | Otra x Paavo                                                     | Sejet                             |
| 253 | 2098 | Golf         | 2 | 1983 | United Kingdom  | [(monte cristo x 5690) x 5793 <sup>2</sup> ] x 5853 <sup>3</sup> | Nickerson                         |
| 250 | 2100 | Gizmo        | 2 | 2006 | Denmark         | Prestige x Ca 800602                                             | Carlsberg                         |
| 247 | 2101 | Gate         | 2 | 1995 | Latvia          | Emir/2*Nadja//HE-497/Hadmersleben 70197/70                       | Priekuli                          |
| 269 | 2102 | Herse        | 6 | 1939 | Norway          | Asplund x Maskin                                                 | Vollebekk                         |
| 271 | 2103 | Hydrogen     | 2 | 1999 | Denmark         | (Alis x Digger) x Derkado                                        | Nordic seed                       |
| 283 | 2104 | Isaria       | 2 | 1924 | Germany         | Bavaria x Danubia                                                | Ackermann                         |
