# Supplementary material for: Precision phenotyping of a barley diversity set reveals distinct drought response strategies
Source: PubMed Central journal article supplement (PMC11231632; doi:10.3389/fpls.2024.1393991), 2024-06-24
Supplement: Table_2.pdf [file Table_2.pdf]

Table S2. Characteristics selected 18 spring barley lines

| Accession | Code | Name         | Rows | Release | Country   | Pedigree                                                     | Breeder                                               |
|-----------|------|--------------|------|---------|-----------|--------------------------------------------------------------|-------------------------------------------------------|
| 148       | 2024 | Artturi      | 6    | 1992    | Finland   | Arra x Nord                                                  | Boreal Plant Breeding Ltd                             |
| 227       | 2073 | Eero         | 6    | 1975    | Finland   | Mari 2r x Otra                                               | Hankkija Plant Breeding Institute                     |
| 243       | 2087 | Frisia       | 6    | 1955    | Germany   | (Granat*Pirthgjarn)*(Eckendorfer WG*Kalckreuthen \ Breustedt |                                                       |
| 193       | 2051 | Chanell      | 2    | 2006    | Denmark   | Barke x Ca 500201                                            | Carlsberg                                             |
| 234       | 2079 | Etu          | 6    | 1970    | Finland   | Bonus M x Varde                                              | Boreal Plant Breeding Ltd                             |
| 238       | 2082 | Favorit      | 2    | 1973    | Czech Rep | Diamant/F.Union                                              | Hrubcice                                              |
| 259       | 2093 | Hankkija_673 | 6    | 1973    | Finland   | (Herta 8 x Byg 191 x Ingrid x Minerva) x Kristina            | Hankkija Plant Breeding Institute                     |
| 269       | 2102 | Herse        | 6    | 1939    | Norway    | Asplund x Maskin                                             | Vollebekk                                             |
| 242       | 2086 | Freja        | 2    | 1941    | Sweden    | Victory X Opal                                               | Svalöf                                                |
| 254       | 2097 | Gorm         | 2    | 1981    | Denmark   | Otra x Paavo                                                 | Sejet                                                 |
| 247       | 2101 | Gate         | 2    | 1995    | Latvia    | Emir/2*Nadja//HE-497/Hadmersleben 70197/70                   | Priekuli                                              |
| 271       | 2103 | Hydrogen     | 2    | 1999    | Denmark   | (Alis x Digger) x Derkado                                    | Nordic Seed                                           |
| 283       | 2104 | Isaria       | 2    | 1939    | Germany   | Bavaria x Danubia                                            | Ackermann                                             |
| 149       | 2025 | Arvo         | 2    | 1966    | Finland   | Balder x Helmi                                               | Agricultural Experiment Station of Finland, Jokioinen |
| 162       | 2033 | Barke        | 2    | 1996    | Germany   | Libelle x Alexis                                             | Breun                                                 |
| 163       | 2034 | Baronesse    | 2    | 1989    | Germany   | ((343/6 x V34/6) x J -427) x (Oriol x LBW6153 P40)           | Nordsaat                                              |
| 166       | 2037 | Binder       | 2    | 1916    | Denmark   | HOR3684/76 ABED selection in Hanna                           | Abed                                                  |
| 240       | 2084 | Formula      | 2    | 1987    | Sweden    | Triumph x A 11 3109                                          | Weibull                                               |

| DETAILS     |            |
|-------------|------------|
| 2- rows     | 12         |
| 6- rows     | 6          |
| Year        | 1916- 2006 |
| Breeders    | 16         |
| Czech Rept  | 1          |
| Denmark     | 4          |
| Finland     | 5          |
| Germany     | 4          |
| Latvia      | 1          |
| Norway      | 1          |
| Sweden      | 2          |
| 7 countries | 18         |
