# Supplementary material for: Precision phenotyping of a barley diversity set reveals distinct drought response strategies
Source: PubMed Central journal article supplement (PMC11231632; doi:10.3389/fpls.2024.1393991), 2024-06-24
Supplement: Table_3.pdf [file Table_3.pdf]

Table S3. Maximum transpiration rate TRmax under well-watered conditions; critical SWC  $\theta_c$  during drought stress from 81-line screen

| Group | Code | Name         | TRmax | $\theta_c$ |
|-------|------|--------------|-------|------------|
| A     | 2024 | Artturi      | 10,42 | 35,59      |
| A     | 2087 | Frisia       | 11,48 | 29,86      |
| A     | 2073 | Eero         | 12,68 | 30,22      |
| B     | 2102 | Herse        | 13,95 | 18,06      |
| B     | 2051 | Chanell      | 14,02 | 25,60      |
| B     | 2079 | Etu          | 15,79 | 25,18      |
| B     | 2093 | Hankkija_673 | 15,88 | 16,83      |
| B     | 2082 | Favorit      | 16,87 | 23,78      |
| C     | 2086 | Freja        | 18,34 | 28,97      |
| C     | 2104 | Isaria       | 18,51 | 27,83      |
| C     | 2103 | Hydrogen     | 18,79 | 28,01      |
| C     | 2101 | Gate         | 19,02 | 27,96      |
| C     | 2097 | Gorm         | 20,22 | 29,40      |
| D     | 2025 | Arvo         | 22,51 | 30,00      |
| D     | 2037 | Binder       | 26,20 | 30,00      |
| D     | 2084 | Formula      | 27,18 | 31,41      |
| D     | 2033 | Barke        | 28,01 | 30,00      |
| D     | 2034 | Baronesse    | 29,18 | 30,00      |
