# Supplementary material for: Precision phenotyping of a barley diversity set reveals distinct drought response strategies
Source: PubMed Central journal article supplement (PMC11231632; doi:10.3389/fpls.2024.1393991), 2024-06-24
Supplement: Table_4.pdf [file Table_4.pdf]

Table S4. Maximum transpiration (E<sub>max</sub>) under well-watered conditions; critical SWC  $\theta_c$  during drought stress, 18 lines

| Group   | Code | Name         | $\theta_c$ | Std. Error c | E <sub>max</sub> | Std. Error of Mean |
|---------|------|--------------|------------|--------------|------------------|--------------------|
| Group 1 | 2103 | Hydrogen     | 42,6533    | 2,918        | 15,1384          | 1,29488            |
|         | 2093 | Hankkija_673 | 40,3231    | 2,27564      | 14,4747          | 0,94255            |
|         | 2034 | Baronesse    | 39,087     | 1,97292      | 13,7502          | 0,50675            |
|         | 2104 | Isaria       | 38,7049    | 1,50548      | 12,7957          | 0,58368            |
| Group 2 | 2033 | Barke        | 40,1149    | 2,31025      | 13,4909          | 0,62889            |
|         | 2097 | Gorm         | 35,8127    | 2,43632      | 13,1754          | 0,60869            |
|         | 2101 | Gate         | 36,4074    | 1,11428      | 12,5033          | 0,21707            |
|         | 2051 | Chanell      | 34,1508    | 1,42127      | 12,0246          | 0,55855            |
|         | 2082 | Favorit      | 34,5064    | 2,23584      | 11,8246          | 0,57105            |
|         | 2087 | Frisia       | 36,0204    | 2,58709      | 11,7394          | 0,90145            |
|         | 2079 | Etu          | 36,9027    | 0,52283      | 11,4477          | 0,57186            |
| Group 3 | 2025 | Arvo         | 35,1197    | 2,10051      | 12,7548          | 0,59304            |
|         | 2037 | Binder       | 31,5549    | 2,24836      | 11,1248          | 0,52813            |
|         | 2084 | Formula      | 30,0064    | 3,07542      | 10,952           | 1,87731            |
|         | 2073 | Eero         | 30,5805    | 2,18401      | 10,5412          | 1,57636            |
|         | 2102 | Herse        | 33,0353    | 1,79695      | 9,3969           | 0,64774            |
|         | 2024 | Artturi      | 31,4731    | 2,30717      | 9,2269           | 0,70764            |
|         | 2086 | Freja        | 26,7912    | 1,23907      | 8,8455           | 0,78473            |
