# Supplementary material for: Precision phenotyping of a barley diversity set reveals distinct drought response strategies
Source: PubMed Central journal article supplement (PMC11231632; doi:10.3389/fpls.2024.1393991), 2024-06-24
Supplement: Table_5.pdf [file Table_5.pdf]

Table S5. Summary of 18-line physiological strategy and performance

| Lines        | 81-line grouping | 18 line grouping | Drought Strategy | Vigor  | Resilience | Recovery |
|--------------|------------------|------------------|------------------|--------|------------|----------|
| Hankkija_673 | B                | 1                | dynamic          | high   | low        | medium   |
| Isaria       | C                | 1                | dynamic          | high   | medium     | medium   |
| Hydrogen     | C                | 1                | dynamic          | high   | medium     | high     |
| Baronesse    | D                | 1                | dynamic          | high   | medium     | high     |
| Frisia       | A                | 2                | isohydric        | medium | medium     | medium   |
| Etu          | B                | 2                | isohydric        | medium | low        | low      |
| Favorit      | B                | 2                | isohydric        | low    | medium     | medium   |
| Chanell      | B                | 2                | isohydric        | medium | medium     | low      |
| Gate         | C                | 2                | isohydric        | medium | medium     | medium   |
| Gorm         | C                | 2                | isohydric        | medium | medium     | high     |
| Barke        | D                | 2                | isohydric        | medium | medium     | medium   |
| Eero         | A                | 3                | anisohydric      | low    | medium     | medium   |
| Artturi      | A                | 3                | anisohydric      | medium | low        | medium   |
| Herse        | B                | 3                | anisohydric      | medium | low        | low      |
| Freja        | C                | 3                | anisohydric      | low    | high       | high     |
| Arvo         | D                | 3                | anisohydric      | medium | medium     | medium   |
| Binder       | D                | 3                | anisohydric      | low    | high       | high     |
| Formula      | D                | 3                | anisohydric      | low    | high       | high     |
